# Supplementary material
Source: PubMed Central journal article supplement (PMC2634606)
Supplement: NIHMS81583-supplement-Supp_Table_2.pdf [file NIHMS81583-supplement-Supp_Table_2.pdf]

**Supplementary Table S2**

Association between GNAQ mutation and factors associated with tumor progression

| <b>Variable</b>               | <b>No. of evaluable cases</b> | <b><i>P</i> value*</b> |
|-------------------------------|-------------------------------|------------------------|
| Patient age                   | 42                            | 0.959                  |
| Gender                        | 42                            | 0.568                  |
| Basal diameter                | 40                            | 0.286                  |
| Tumor thickness               | 42                            | 0.101                  |
| Ciliary body involvement      | 42                            | 0.749                  |
| Tumor pigmentation            | 42                            | 0.347                  |
| Histopathologic cell type     | 42                            | 0.166                  |
| Extracellular matrix patterns | 13                            | 1.000                  |
| GEP class                     | 42                            | 0.763                  |
| Chromosome 3 status           | 42                            | 0.764                  |
| 6p gain                       | 35                            | 0.724                  |
| 8p loss                       | 42                            | 1.000                  |
| 8q gain                       | 35                            | 0.460                  |
| Membranous $\beta$ -catenin   | 23                            | 1.000                  |
| Cytokeratin-18 expression     | 27                            | 0.595                  |
| Membranous E-cadherin         | 28                            | 0.702                  |
| Metastasis-free survival      | 42                            | 0.142                  |

\*P value derived from Fisher exact test for categorical variables, Mann-Whitney test for continuous variables, and Kaplan-Meier analysis for survival. GEP, gene expression profile.
